# Supplementary material for: Pavlovian Reward Prediction and Receipt in Schizophrenia: Relationship to Anhedonia
Source: PLoS One. 2012 May 4;7(5):e35622. doi: 10.1371/journal.pone.0035622 (PMC3344823; doi:10.1371/journal.pone.0035622)
Supplement: Table S2 — Post-hoc paired t-tests for unexpected versus expected rewards and non-rewards within patient and control groups. (XLS) [file pone.0035622.s007.xls]

## Sheet: Sheet1
Table S2: Paired t-tests for unexpected versus expected rewards and non-rewards within patient and control group
Brain Region	Brodmann Area	Talairach Coordinates	# Voxels	Paired t-tests
				Unexpected vs Expected Outcomes		Unexpected vs Expected Reward		Unexpected vs Expected Non-reward
				CON (p)	SCZ (p)	CON (p)	SCZ (p)	CON (p)	SCZ (p)
L VLPFC	47	-44, +22, -6	20	0.00072	0.032	0.0017	0.22	0.53	0.0073
R Anterior Insula	13	+34, +17, +4	57	0.0019	0.0049	0.1	0.4	0.0027	0.0004
L Anterior Insula	13	-34, +16, +4	60	0.0048	0.014	0.073	0.55	0.014	0.001
R Anterior Insula	13/45	+41, +21, +4	208	0.0015	0.0011	0.062	0.044	0.0084	0.00072
L Anterior Insula	13/45	-40, +17, +0	89	0.0007	0.0082	0.015	0.62	0.012	0.00023
L Superior frontal Gyrus	9	-31, +47, +28	26	0.0051	0.0028	0.038	0.0065	0.037	0.047
L Posterior Cingulate	43	-1, -31, +26	25	0.0073	0.035	0.08	0.13	0.01	0.05
R Middle Frontal Gyrus	6	+42, +11, +42	137	0.012	9.7e-05	0.078	0.0096	0.18	0.0016
L Middle Frontal Gyrus	9	-44, +19, +32	18	0.011	0.0036	0.06	0.083	0.057	0.03
L Middle Frontal Gyrus	6	-39, +4, +34	14	0.0025	0.015	0.1	0.037	0.07	0.12
R Inferior Parietal Lobule	40	+44, -52, +40	151	0.035	9.1e-05	0.46	0.066	0.026	4.5e-05
L Inferior Parietal Lobule	7	-39, -60, +42	139	0.024	0.00018	0.26	0.0051	0.028	0.0065
L Superior Frontal Gyrus	8	-1, +20, +48	67	0.0017	0.0064	0.03	0.72	0.026	0.0014
CON = control group, SCZ = schizophrenia group, VLPFC = ventrolateral prefrontal cortex
